# Supplementary material
Source: Elsevier journal article supplement (https://www.sciencedirect.com/science/article/pii/S0213911115002514)
Supplement: mmc1 [file S0213911115002514:mmc1.docx]

**Apéndice**

**Tabla I**

Citas textuales de las categorías «Estrategias para lograr el acceso a medicamentos del Componente Especializado de la Asistencia Farmacéutica» y «Efectos de las vías alternativas»

| **Estrategias para lograr el acceso a medicamentos del Componente Especializado de la Asistencia Farmacéutica** | |
| --- | --- |
| **Subcategorías** | **Afirmaciones** |
| Préstamos y compra privada | (P5) «En mi caso, ninguna farmacia vende el remedio… yo tuve que buscar a alguien que lo tuviera para que me prestara [el medicamento]»  (P8) «Yo me quedé un tiempito sin el medicamento, entonces, fue aprobado y tal, pero entonces no había el medicamento [en el punto de dispensación], y al siguiente mes tampoco. Entonces lo tuve que comprar» |
| Judicialización | (M1) «Uno tiene dos opciones, o cumple los criterios del protocolo o va para la justicia»  (M5) «Debido a algunas limitaciones [de los PCDT], entonces uno manda para la vía judicial»  (P6) «Yo también recibo un medicamento por la vía judicial» |
| Mecanismos para saltar la fila | (M5) «Allá nosotros agilizamos las espirometrías por la demora en el puesto [de salud] para agendar»  (P3) «Ella ya llevaba 2 años sin consulta. Para facilitar, la doctora tiene una agenda especial para cuando [el usuario] necesita y está con dificultad, y [el usuario] que está un buen tiempo sin conseguir [consulta] va allá y conversa con ella. Ella ayuda» |
| Sistema ficticio de consultas y exámenes | (P7) «Quién sabe, si se aumentara el plazo de renovación [de la dispensación] sería más fácil de conseguir una consulta verdadera cada 6 meses, que una de mentiras cada 3»  (P3) «Y ahí aumenta [el médico] la dosis sin ni ver a la paciente... ya ocurrió varias veces, no sé lo que eso va a causar, que mi hija no tenga consulta, pero la médica prescribe [el medicamento], ya está hace un tiempo así»  (F6) «Otra cosa que ocurre, que es real y una cosa que es un hacer de cuenta, son las renovaciones. Ellos [usuarios] no van al médico y qué ocurre, en realidad yo les entregaba [los documentos para la renovación de la dispensación a los usuarios] y ellos [los usuarios] los entregaban en la recepción [del consultorio] y la secretaria se los pasaba al médico y el médico sólo firmaba el informe [de seguimiento del paciente]» |
| **Efectos de las vías alternativas** | |
| **Subcategorías** | **Afirmaciones** |
| Demuestran concepción frágil del derecho a la salud dos usuarios | (M6) «En general qué es lo que uno acaba viendo, que los pacientes que tienen más recursos económicos y culturales son los que acaban accediendo con más facilidad [a los medicamentos] que los que realmente necesitan. O ellos no se consideran autorizados a requerir eso [los medicamentos], o no saben cómo pedir eso [los medicamentos], entonces eso acaba siendo un gran obstáculo»  (P3) «No sabía que tenía derecho a ese tratamiento. Estoy feliz por el programa que el gobierno dio»  (P6) «Yo pienso así: cuántas personas no saben que tienen este derecho, ¿no? ¡No son orientadas!» |
| No garantizan que los demás servicios necesarios para el seguimiento del tratamiento estén disponibles | (F1) «Un medicamento que a veces está causando alguna reacción o no está siendo efectivo, va a ocasionar una hospitalización, complicaciones [en el estado de salud del paciente, porque no se realiza el acompañamiento adecuado]...»  (M6) No hay unidad básica, no hay especialistas suficientes en la red [de servicios]… y los hospitales están siempre súper, súper llenos, cuantos más recursos tengas, incluyendo el medicamento para mantener al paciente en la comunidad, mejor»  (F2) «… [El farmacéutico] no sabe lo que está pasando, está entregando el medicamento, para qué, así, ¿sabe? ¿Está mejorando? Si está recibiendo el tratamiento correcto u ocurrió algo que requiera suspender el tratamiento. No sabemos nada, no hay monitoreo [a los pacientes]…»  (F6) «...pues muchos tenían que hacer la renovación [de la prescripción] con el médico especialista que el municipio no tenía… porque logra garantizar el acceso, pero es un acceso que no es adecuado, no es completo. Pero eso es un problema más amplio porque ellos [médicos] entienden que la renovación, la renovación en sí, va a generar una consulta más y a veces tú no tienes consulta para todos…» |
| Generan dependencia de profesionales que «ayudan» | (P6) «Todo depende de tener la fortuna de encontrar un médico bueno, consiente, que te guíe, que te oriente»  (P3) «Y la médica dijo: calma madre, todo tiene solución, yo te voy a mostrar los caminos que tú vas a seguir y tú lo vas a conseguir [el medicamento]»  (P10) «Hay médicos que no se sienten en la obligación de ayudar, de escribir [diligenciar adecuadamente los documentos requeridos para la dispensación]»  (M1) (M3) «Conozco una farmacéutica que ayuda, que da información» |
| Generan la percepción de que los exámenes, informes y formularios son papeles innecesarios | (P3) «Piden muchos papeles. Está en el puesto [de salud] el papel [documentos] entregado, y ¿tú te vas a quedar sin el remedio?… Porque aquí [punto de dispensación] ellos quieren el papel. Y no hay nada más que hacer»  (F6) «Entonces manda su hojita, ¿sí? Él [médico] te va a ver y no va a pedir examen, realmente, él solo te va a ver y firmar una hoja, sólo que eso va a traer como consecuencia una consulta menos, para una persona que está precisando realmente…»  (M6) «A veces yo creo que quien está allá recibiendo el papel [prescripción, informes, exámenes] se agarra de comas y detalles que son irrelevantes»  (P3) «Entonces, lo más difícil… son muchos papeles, aprovecha y trae un poco, ahí falta otro poco y vuelve. Ahí vuelve, ahí funcionó, no funcionó. Lo que me pareció más difícil fue esa parte de que piden muchos papeles, ahí tiene que volver donde el médico para poder hacer [el trámite]» |
